# Supplementary material
Source: Springer Nature journal article supplement (https://www.springermedizin.de/resource/supplementary/12902_2012_155_MOESM4_ESM.pdf/9515600)

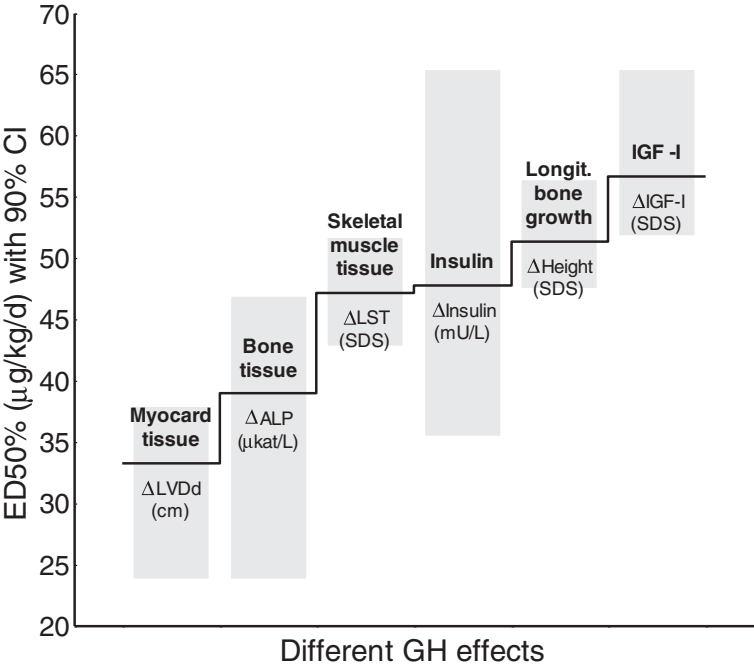

Supplement: MOESM4 [file 9515600]
